# Supplementary material for: Personalised Hip Therapy: development of a non-operative protocol to treat femoroacetabular impingement syndrome in the FASHIoN randomised controlled trial
Source: Br J Sports Med. 2016 Oct;50(19):1217–23. doi: 10.1136/bjsports-2016-096368 (PMC5036255; doi:10.1136/bjsports-2016-096368)
Supplement: Supplementary file C [file bjsports-2016-096368supp_C.pdf]

## 1. Gym Ball Exercise

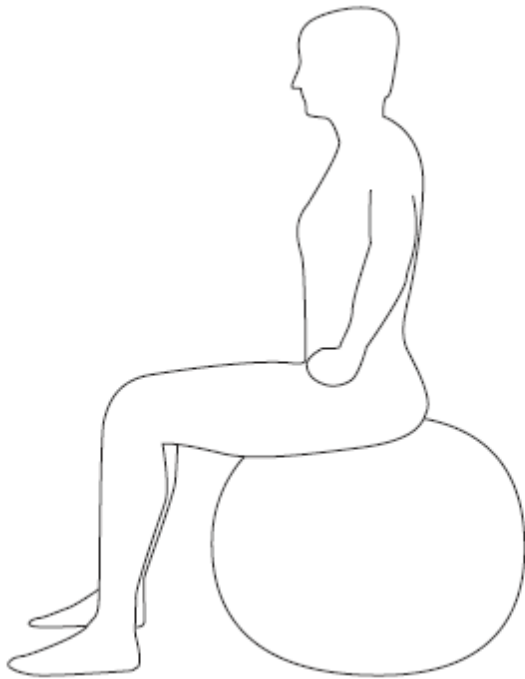

### Description

- Practise sitting on the ball and gently moving your pelvis forwards and backwards, side to side and in circles.

### Prescription

To be customised for the patient and progressed. E.g. duration, frequency, repeats, addition of theraband etc.

Duration \_\_\_\_\_

Frequency \_\_\_\_\_

Additional information \_\_\_\_\_

### Extra option 1

- Lift one foot from the floor whilst maintaining your balance and keeping good symmetrical posture on the ball.
- Relax and repeat on alternate legs.

## 2. Abdominal Exercise

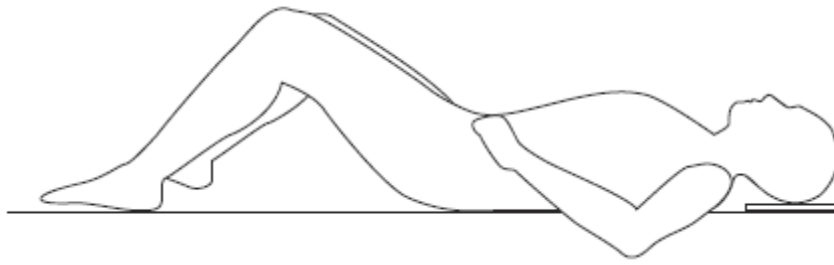

### Description

- On your back, draw the belly button down towards the spine
- Keep pelvis still and keep breathing!

### Prescription

To be customised for the patient and progressed. E.g. duration, frequency, repeats, addition of theraband etc.

Duration \_\_\_\_\_

Frequency \_\_\_\_\_

Additional information \_\_\_\_\_

### 3. Stability Exercise q

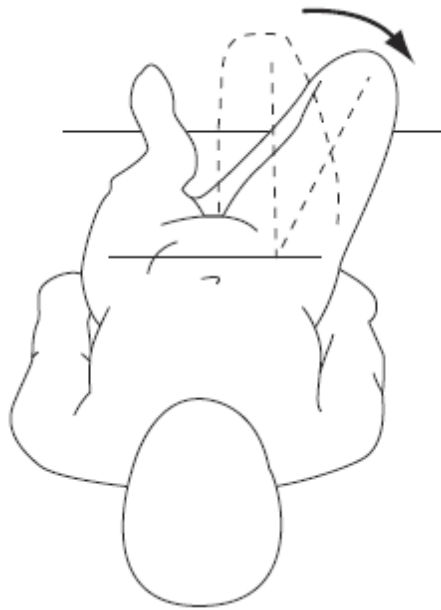

#### Description

- Lie on back with legs bent, feet together and flat on the bed.
- Keep the lower back in neutral position throughout the exercise.
- Tighten the lower stomach muscles as described in abdominal exercise.
- Sustain throughout the exercise.
- Keeping the heel on the floor slowly let one hip roll out to the side.
- Only roll the leg as far as trunk control allows.
- Slowly return to the start position with control.
- Make sure that you keep the muscle at the front of your hip relaxed.
- Repeat on the opposite side
- Repeat \_\_\_\_ times on each leg.

#### Prescription

To be customised for the patient and progressed. E.g. duration, frequency, repeats, addition of theraband etc.

Duration \_\_\_\_\_

Frequency \_\_\_\_\_

Additional information \_\_\_\_\_

#### 4. Stability Exercise r

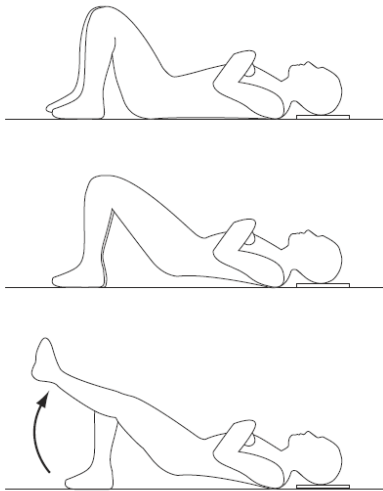

##### Description

- Lie on the back with knees bent and feet slightly apart.
- Tighten the lower stomach muscles as described in abdominal exercise.
- Keeping the back flat slowly lift the pelvis until your knees, hips and shoulders are level.
- Hold this position for \_\_\_\_ seconds, relax slowly.
- Repeat up to \_\_\_\_ times.
- You should feel your bottom and stomach muscles doing the work and not the hamstring muscles at the back of the thigh.

##### Prescription

To be customised for the patient and progressed. E.g. duration, frequency, repeats, addition of theraband etc.

Duration \_\_\_\_\_

Frequency \_\_\_\_\_

Additional information \_\_\_\_\_

##### Extra Option 1

- Same as above but when you have your bottom lifted try lifting one heel at a time from the bed whilst keeping your pelvis still.
- Hold this position for \_\_\_\_ seconds, relax slowly.
- Repeat up to \_\_\_\_ times.

##### Extra Option 2

- Same as above but then shift the weight onto one foot and slowly straighten the other knee without side shifting or twisting the pelvis excessively.
- The knees should stay slightly apart.
- Slowly return to the start position with control.
- Hold this position for \_\_\_\_ seconds, relax slowly.
- Repeat up to \_\_\_\_ times.

Your Physiotherapist is: \_\_\_\_\_  
Contact Number is: \_\_\_\_\_

## 5. Stability Exercise t

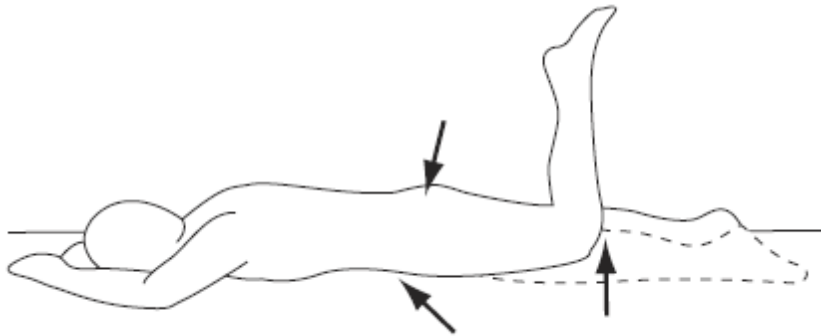

### Description

- Lie face down with hips and back relaxed and one knee bent.
- Tighten the lower stomach muscle and gently squeeze both buttocks to flatten the lower back.
- Hold this contraction and lift the bent leg 5cm.
- Do not let the back arch or pelvis twist.
- Hold for \_\_\_\_ seconds.
- Repeat \_\_\_\_ times on each leg.

### Prescription

To be customised for the patient and progressed. E.g. duration, frequency, repeats, addition of theraband etc.

Duration \_\_\_\_\_

Frequency \_\_\_\_\_

Additional information \_\_\_\_\_

## 6. Stability Exercise o

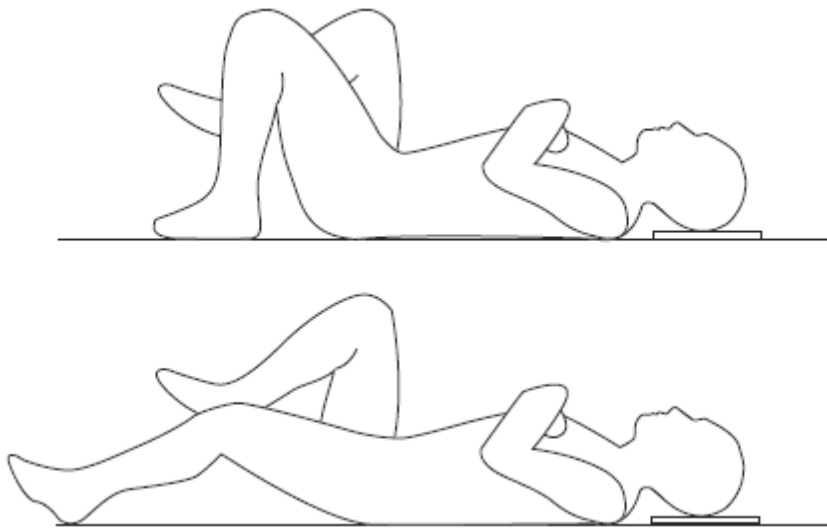

### Description

- Lie on back with legs bent, feet together and flat on the bed.
- Keep the lower back in a neutral position throughout the exercise.
- Tighten the lower stomach muscles as described in abdominal exercise and sustain throughout the exercise.
- Keeping the heel on the floor, slowly slide the leg out
- Only slide the leg as far as trunk control allows.
- Slowly return to the start position with control.
- Repeat on the opposite side.
- Repeat \_\_\_ times on each leg.

### Prescription

To be customised for the patient and progressed. E.g. duration, frequency, repeats, addition of theraband etc.

Duration \_\_\_\_\_

Frequency \_\_\_\_\_

Additional information \_\_\_\_\_

## 7. Stability Exercise p / Clam

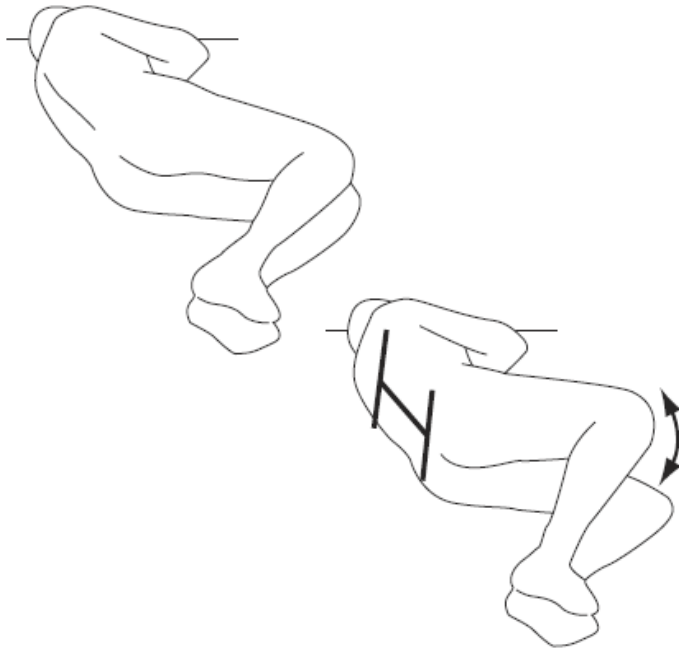

### Description

- Lie on the side with pelvis square, the hips flexed to approximately 45 degrees and the knees bent.
- Tighten the lower stomach muscles as in exercise 1 to maintain the back to a neutral position throughout the exercise.
- Leaving the heels together slowly lift the top knee by turning the hip out without letting the back or pelvis twist.
- Only turn out as far as stable back and pelvis allow.
- Hold this position with minimal effort.
- Hold for \_\_\_ seconds
- Repeat \_\_\_ times.

### Prescription

To be customised for the patient and progressed. E.g. duration, frequency, repeats, addition of theraband etc.

Duration \_\_\_\_\_

Frequency \_\_\_\_\_

Additional information \_\_\_\_\_

Your Physiotherapist is: \_\_\_\_\_  
Contact Number is: \_\_\_\_\_

## 8. Stability Exercises

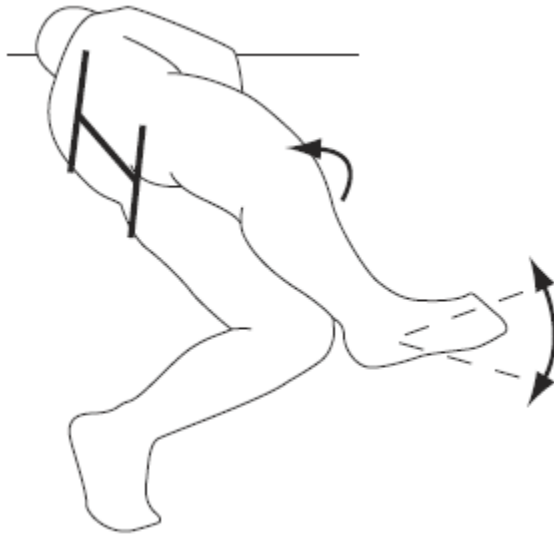

### Description

- Lie on your side with the pelvis square.
- The bottom leg is comfortably bent while the top leg is held straight.
- Tighten the lower stomach to keep the back in a neutral position throughout the exercise.
- Keep the knee facing forward / out.
- Lift the leg up and back slightly.
- Hold this position for a few seconds then slowly turn the leg back in.
- Only turn out as far as a stable back and pelvis allow.
- Hold for \_\_\_\_ seconds.
- Repeat \_\_\_\_ times.

### Prescription

To be customised for the patient and progressed. E.g. duration, frequency, repeats, addition of theraband etc.

Duration \_\_\_\_\_

Frequency \_\_\_\_\_

Additional information \_\_\_\_\_

## 9. Stability Exercise g

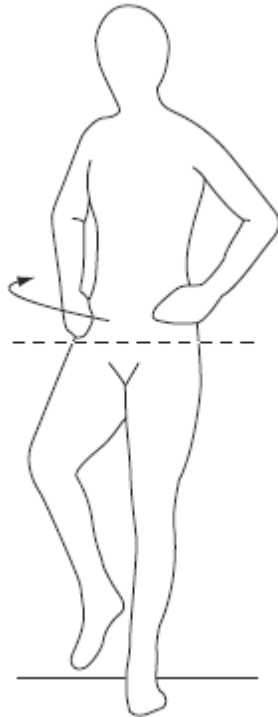

### Description

- Stand tall with feet together and weight over the mid foot (do not let the pelvis sway forward).
- Gently squeeze both buttocks then slowly lift one foot behind you (5cms).
- Keep the shoulders and pelvis level
- Slowly turn body away from the weight bearing leg.
- Do not allow any forward or sideways tilt of the pelvis.
- Make sure the buttock on the weight bearing leg remains tight.
- Hold for \_\_\_\_ seconds.
- Repeat \_\_\_\_ times

### Prescription

To be customised for the patient and progressed. E.g. duration, frequency, repeats, addition of theraband etc.

Duration \_\_\_\_\_

Frequency \_\_\_\_\_

Additional information \_\_\_\_\_

## 10. Stability Exercise h

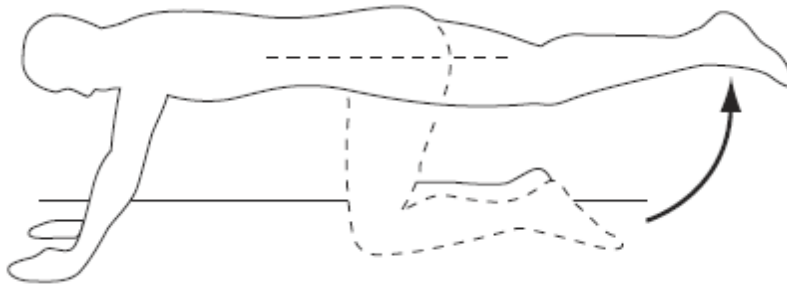

### Description

- On hands and knees with the knees under the hips and the back relaxed in a neutral position.
- Keep the back controlled, slowly straighten the hip and knee to lift the leg out behind you.
- Contract the buttocks slightly during the leg lift.
- Do not let the back arch or twist.
- Only lift as far as the stable back allows.
- Hold for \_\_\_ seconds then lower slowly.
- Repeat \_\_\_ times.

### Prescription

To be customised for the patient and progressed. E.g. duration, frequency, repeats, addition of theraband etc.

Duration \_\_\_\_\_

Frequency \_\_\_\_\_

Additional information \_\_\_\_\_

## 11. Stability Exercise L / Forward Lunge

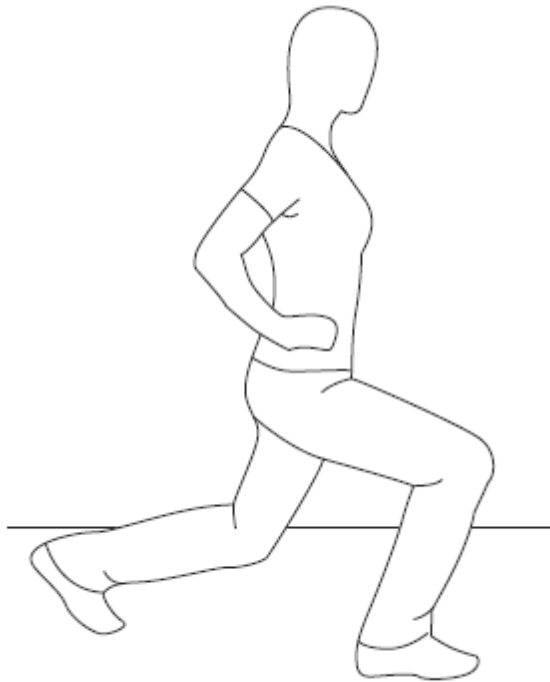

### Description

- Stand straight.
- Take a step forward and bend your knees.
- Return to the starting position.
- Repeat \_\_\_ times.

### Prescription

To be customised for the patient and progressed. E.g. duration, frequency, repeats, addition of theraband etc.

Duration \_\_\_\_\_

Frequency \_\_\_\_\_

Additional information \_\_\_\_\_

## 12. Stability Exercise z

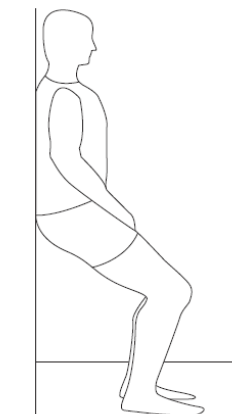

### Description

- In standing, back against a wall.
- Slide down wall about 6-8 inches.
- Keep back against the wall.
- Repeat \_\_\_ times.

### Prescription

To be customised for the patient and progressed. E.g. duration, frequency, repeats, addition of theraband etc.

Duration

Frequency

Additional information

---

---

---

### Extra Option 1

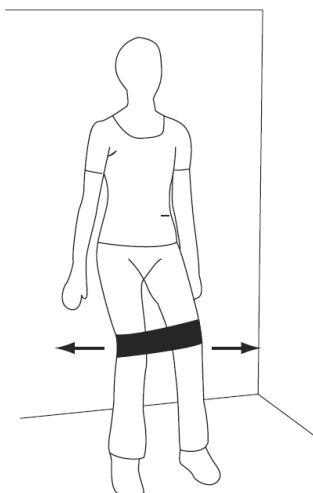

- Place a theraband around your knees.
- Try to separate your knees against the resistance of the theraband. At the same time slide down wall about 6-8 inches and then relax the theraband.
- Repeat \_\_\_ times.

### 13. VMO Exercise

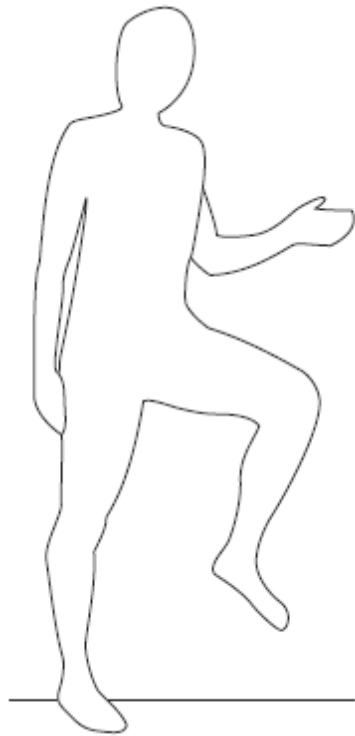

#### Description

- Lean sideways against the wall, standing on your operated leg.
- Bend the non-effected leg up against the wall in front of you.
- Use the non-effected leg to push against the wall while keeping your balance with the muscles of the operated leg.
- Hold for \_\_\_\_ seconds.
- Repeat \_\_\_\_ times.

#### Prescription

To be customised for the patient and progressed. E.g. duration, frequency, repeats, addition of theraband etc.

Duration \_\_\_\_\_

Frequency \_\_\_\_\_

Additional information \_\_\_\_\_

#### Extra Option 1

- Same as above
- Add in an exercise ball between the non-effected leg (knee) and the wall, while keeping your balance with the muscles of the operated leg.

Your Physiotherapist is: \_\_\_\_\_  
Contact Number is: \_\_\_\_\_

## 14. Bottom Lift

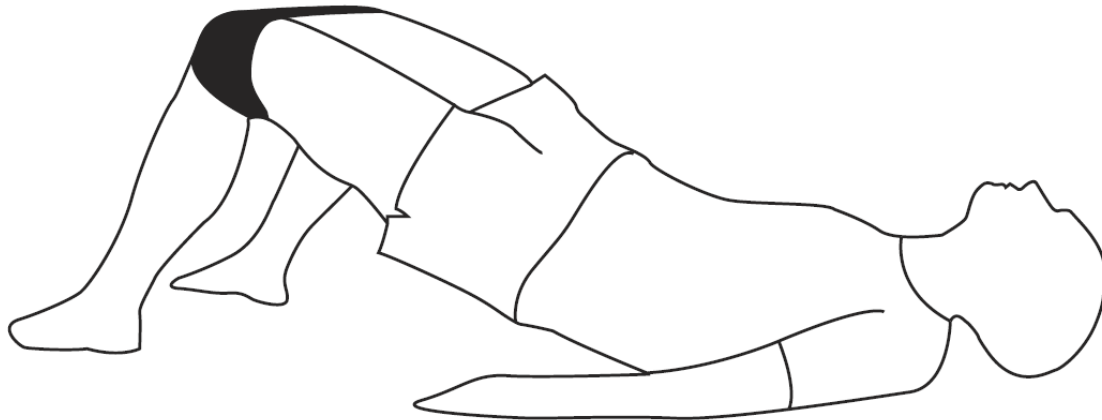

### Description

- Lie on your back, hip and knees bent, theraband around your knees
- Lift hips whilst keeping knees apart
- Lower keeping knees apart.
- Repeat \_\_\_\_ times.

### Prescription

To be customised for the patient and progressed. E.g. duration, frequency, repeats, addition of theraband etc.

Duration \_\_\_\_\_

Frequency \_\_\_\_\_

Additional information \_\_\_\_\_

## 15. Inverted Hamstring Strength Exercise

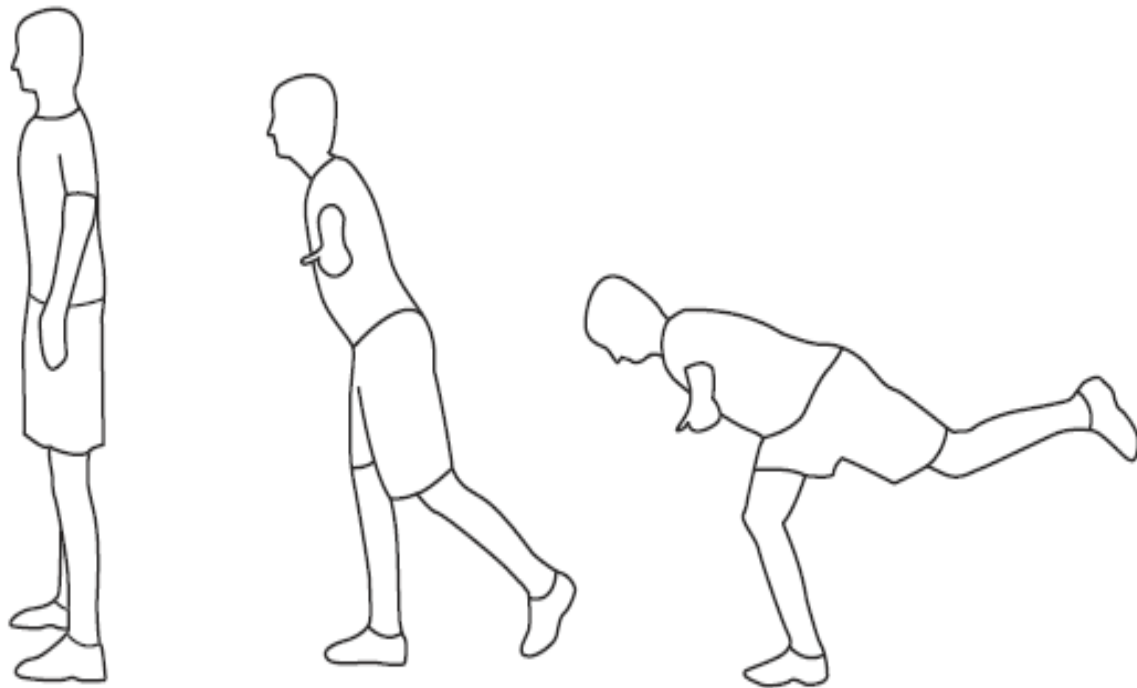

### Description

- Straight arms.
- Maintain core.
- Fully extend hip and knee.
- Hold for \_\_\_\_ seconds.
- Aim to do \_\_\_\_ repeats.

### Prescription

To be customised for the patient and progressed. E.g. duration, frequency, repeats, addition of theraband etc.

Duration \_\_\_\_\_

Frequency \_\_\_\_\_

Additional information \_\_\_\_\_

## 16. 3 Way Lunge Strength Exercise

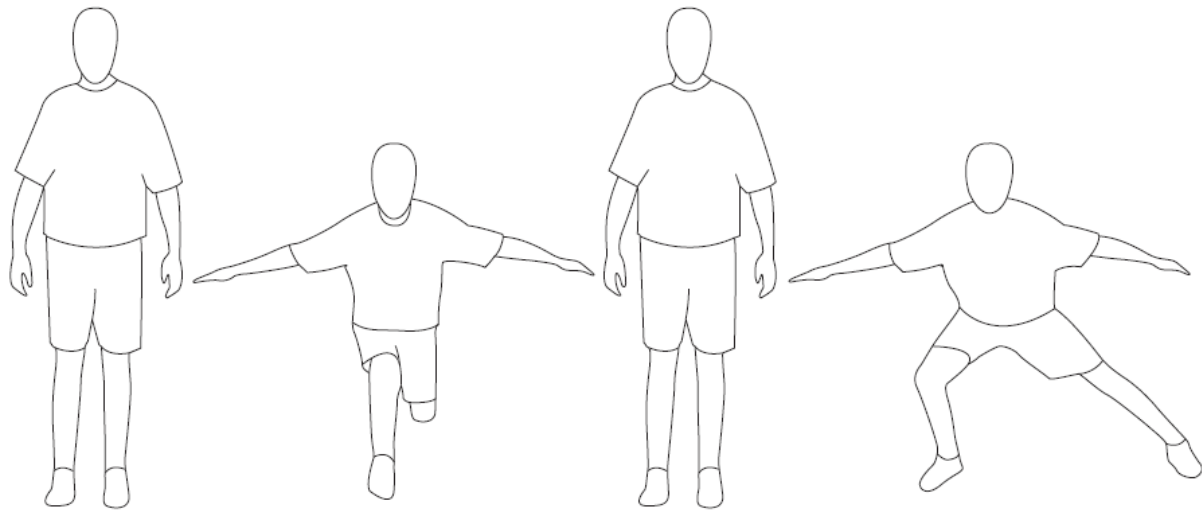

### Description

- From starting position, lunge forward, then straight backward then to side
- \_\_\_ times through, so in effect \_\_\_ toe touches on each leg

### Prescription

To be customised for the patient and progressed. E.g. duration, frequency, repeats, addition of theraband etc.

Duration \_\_\_\_\_

Frequency \_\_\_\_\_

Additional information \_\_\_\_\_

## 17. Crab Walk Strength Exercise

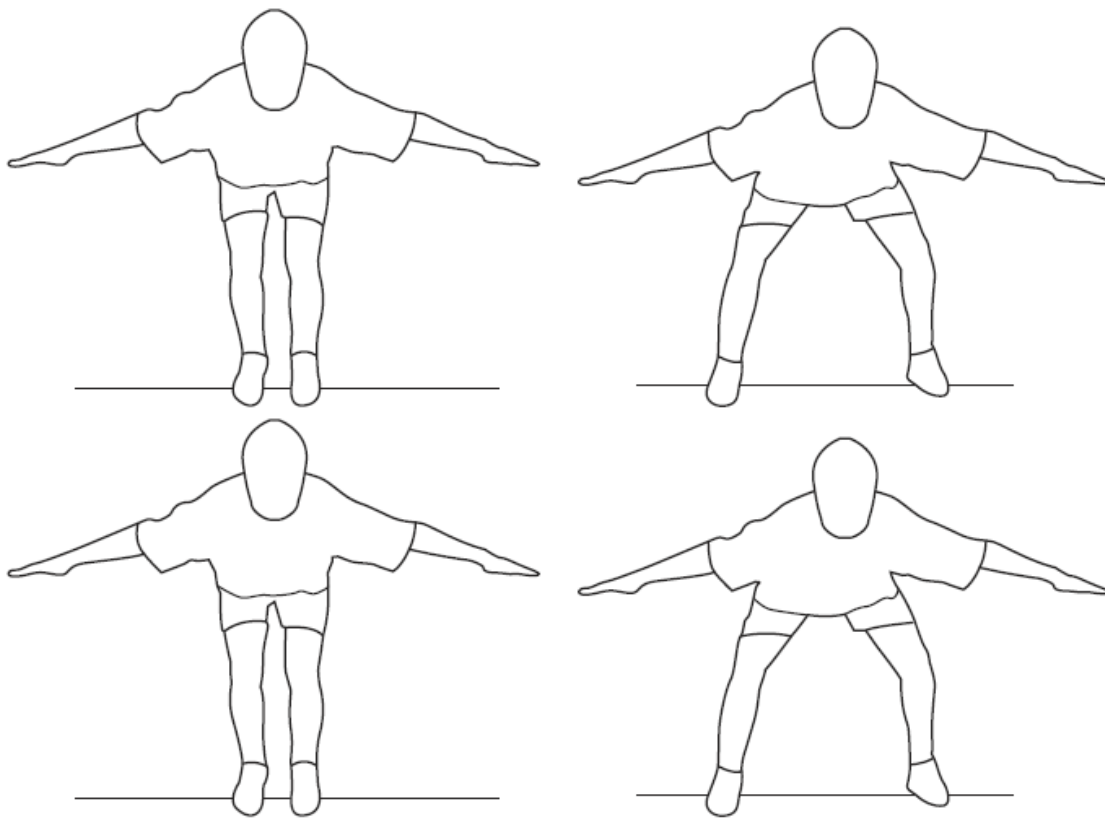

### Description

- 15m long line
- Stay low in squat position
- Side step both directions

### Prescription

To be customised for the patient and progressed. E.g. duration, frequency, repeats, addition of theraband etc.

Duration \_\_\_\_\_

Frequency \_\_\_\_\_

Additional information \_\_\_\_\_

## 18. Gluteal Dip Strength Exercise

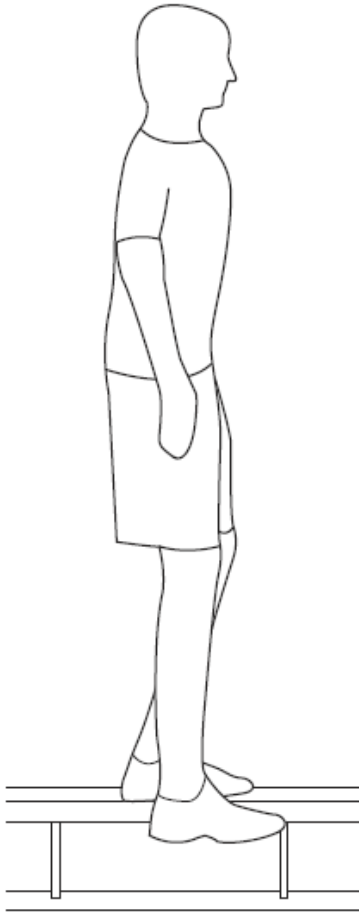

### Description

- Stand on a raised stable surface, with a straight back.
- Stand on one leg, with the free leg straight and off the edge of the surface.
- Allow the free leg to dip down below the surface 5-10cm.
- Do the same on the other leg.
- Should feel “burn” in standing leg around the buttock area.

### Prescription

To be customised for the patient and progressed. E.g. duration, frequency, repeats, addition of theraband etc.

Duration \_\_\_\_\_

Frequency \_\_\_\_\_

Additional information \_\_\_\_\_

Your Physiotherapist is: \_\_\_\_\_  
Contact Number is: \_\_\_\_\_

## 19. Side Plank

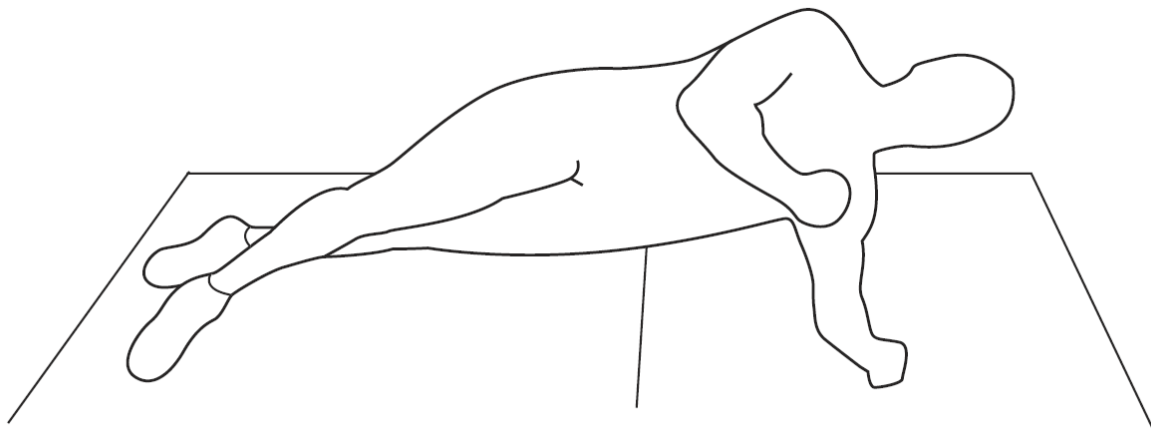

### Description

- Lying on your side, elbow of bottom arm on the floor, and top leg in front of bottom leg.
- Raise your hips up so that your spine is like a board.
- Do not let your legs sag down or backwards.
- Hold for \_\_\_\_ seconds.

### Prescription

To be customised for the patient and progressed. E.g. duration, frequency, repeats, addition of theraband etc.

Duration \_\_\_\_\_

Frequency \_\_\_\_\_

Additional information \_\_\_\_\_

## **20. Kneeling / Hip Flexor Stretching**

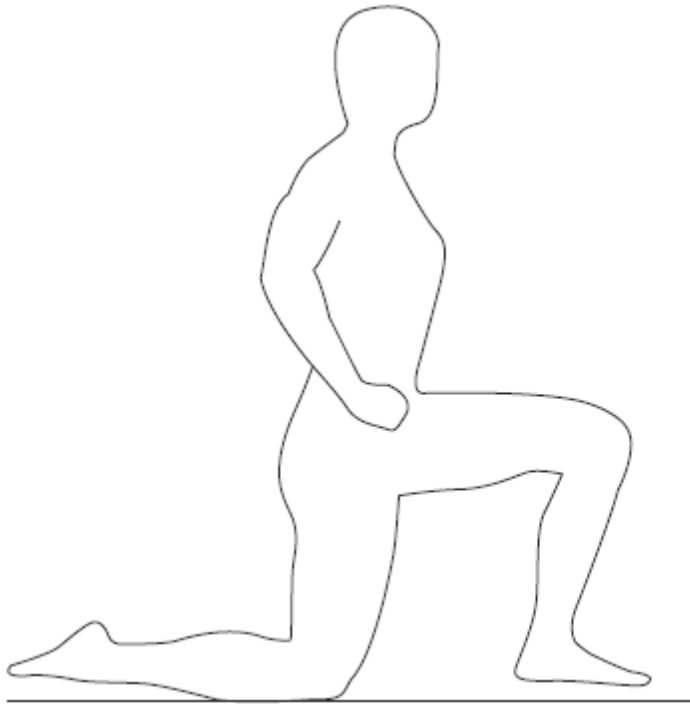

### **Description**

- Kneel on the floor with your trunk upright.
- Gently lean back at the waist until you feel a pull on the front of your thighs.
- Hold for \_\_\_ seconds.
- Repeat \_\_\_ times.

### **Prescription**

To be customised for the patient and progressed. E.g. duration, frequency, repeats, addition of theraband etc.

Duration \_\_\_\_\_

Frequency \_\_\_\_\_

Additional information \_\_\_\_\_

## 21. External Rotation Stretches

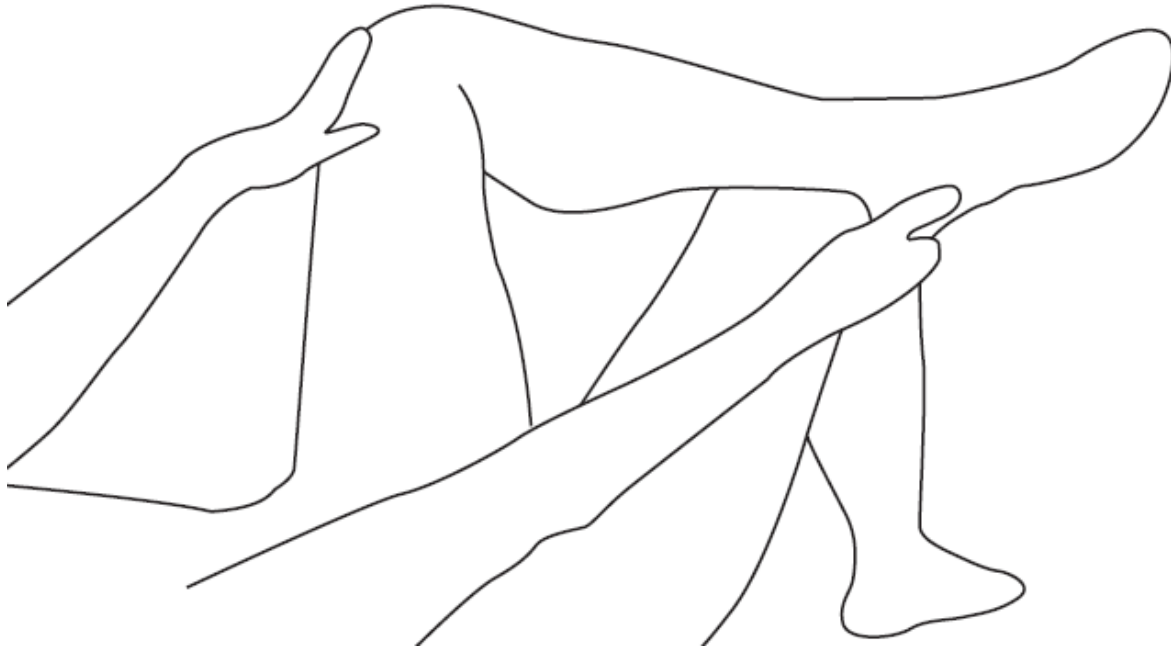

### Description

- On your back with hips bent, place effected legs ankle onto opposite knee (as shown).
- Slowly bend non-effected hip and feel pull in buttock.
- Hold for \_\_\_ seconds.
- Repeat \_\_\_ times.

### Prescription

To be customised for the patient and progressed. E.g. duration, frequency, repeats, addition of theraband etc.

Duration \_\_\_\_\_

Frequency \_\_\_\_\_

Additional information \_\_\_\_\_

## 22. Pelvic tilt exercises

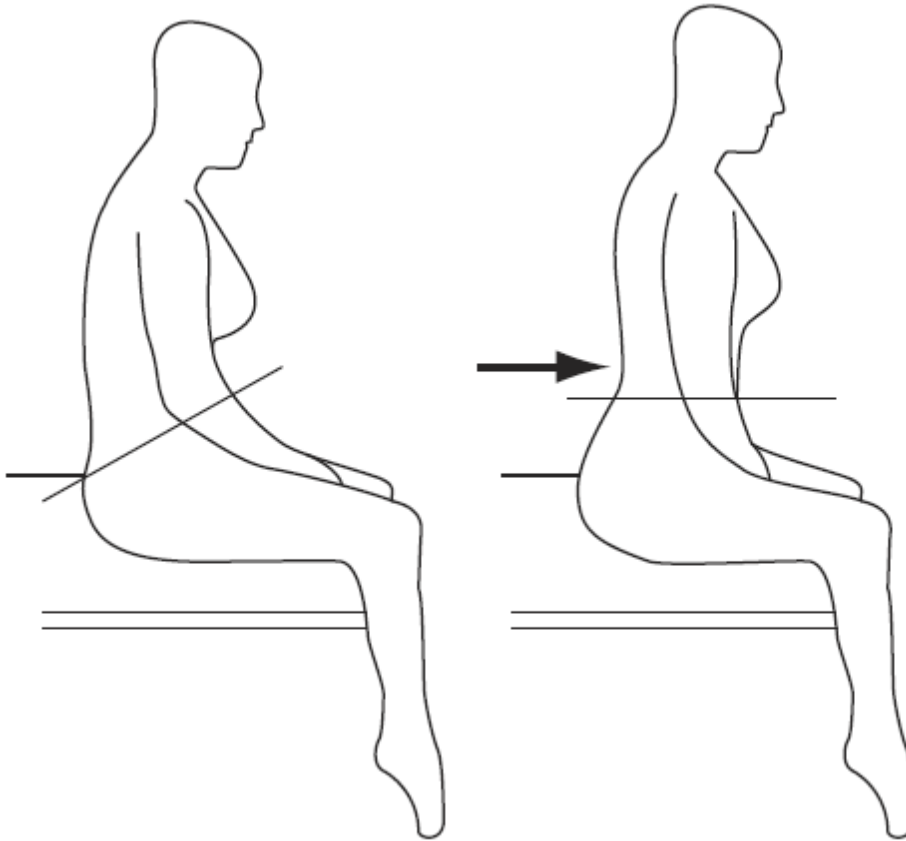

### Description

- Sit comfortably with knees bent over the edge of a chair or table
- Allow abdominal, pelvic and lower back muscles to relax
- Then tighten the lower back and pelvis muscles in order to exaggerate the lumbar curvature of the lower back and bring the pelvis into a more upright position (see second diagram).
- Hold for \_\_\_\_ seconds
- Then relax back

### Prescription

To be customised for the patient and progressed. E.g. duration, frequency, repeats, addition of theraband etc.

Duration \_\_\_\_\_

Frequency \_\_\_\_\_

Additional information \_\_\_\_\_

Your Physiotherapist is: \_\_\_\_\_  
Contact Number is: \_\_\_\_\_

## **23. Anterior capsule hip joint mobilisations**

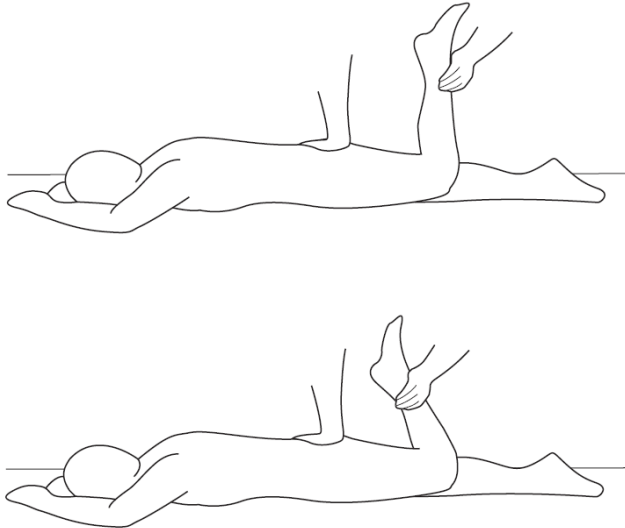

### **Description**

- Patient lying prone
- You may place a rolled up towel under thigh to bring hip into slight extension
- Place hand over the posterior aspect of the greater trochanter
- You may need to flex the knee to wind up rectus femoris and tighten anterior capsule (second diagram).
- Use your hand to push and mobilise the femoral head in a posterior anterior direction.
- N.B You can add in external rotation to wind the anteromedial capsule up before applying the posterior anterior mobilisation.

### **Prescription**

Not applicable

## 24. Hip joint glides

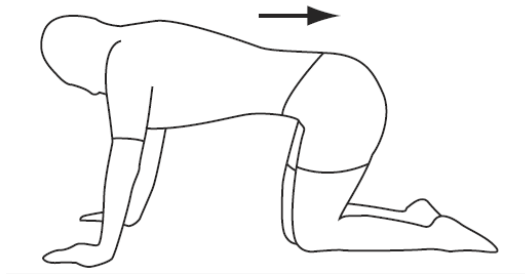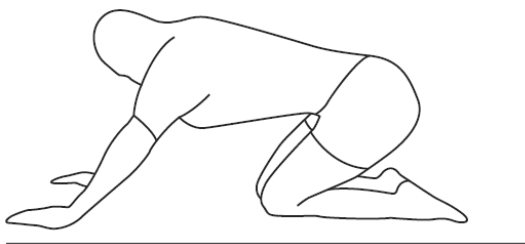

### Description

- On all fours with arms and thighs vertical
- Gently rock backwards so that arms are in front and the knees bend
- Rock backwards as far as is comfortable and hold for \_\_\_\_ seconds
- Return to starting position
- Repeat \_\_\_\_ times

### Prescription

To be customised for the patient and progressed. E.g. duration, frequency, repeats, addition of theraband etc.

Duration \_\_\_\_\_

Frequency \_\_\_\_\_

Additional information \_\_\_\_\_
